# Supplementary material for: An Empathy-Driven, Conversational Artificial Intelligence Agent (Wysa) for Digital Mental Well-Being: Real-World Data Evaluation Mixed-Methods Study
Source: PubMed Central journal article supplement (PMC6286427; doi:10.2196/12106), 2018-11-23
Supplement: mhealth_v6i11e12106_app5.pdf [file mhealth_v6i11e12106_app5.pdf]

## Multimedia Appendix 5: In-app feedback question and responses

| Reference | Feedback question                               | Details                                                                                                                                                                                                                                                              | Pre formatted response options                                                                                                                                                                                                       | Total responses |
|-----------|-------------------------------------------------|----------------------------------------------------------------------------------------------------------------------------------------------------------------------------------------------------------------------------------------------------------------------|--------------------------------------------------------------------------------------------------------------------------------------------------------------------------------------------------------------------------------------|-----------------|
| Q1        | “Have I been able to help you feel better yet?” | <p><b>Objective:</b> Obtain Session effectiveness</p> <p><b>Frequency:</b> At the end of every wellness based session</p> <p><b>Trigger question:</b> When user responds positively to bot-asked question <b>“Before you go can I ask how I’m doing so far?”</b></p> | <p>“Yes, actually”;</p> <p>“Not Yet”;</p> <p>Trigger options</p> <p>“I like it”; (positive)</p> <p>“Not today”;</p> <p>“So Far, So Good”;</p> <p>(positive)</p> <p>“Not Very Well”;</p> <p>(negative)</p>                            | 172             |
| Q2        | “Did that help?”                                | <p><b>Objective:</b> Obtain mindfulness technique effectiveness</p> <p><b>Frequency:</b> At the end of every mindfulness session</p>                                                                                                                                 | <p>“Listen to me”;</p> <p>“Yeah actually”;</p> <p>“Not Really”;</p>                                                                                                                                                                  | 63              |
| Q3        | “Do you feel better?”                           | <p><b>Objective:</b> Obtain Physical activity technique effectiveness</p> <p><b>Frequency:</b> At the end of every tool-based session</p>                                                                                                                            | <p>“Yes, Actually”;</p> <p>“Not Really”;</p>                                                                                                                                                                                         | 19              |
| Q4        | “Anything specific you’d like to improve?”      | <p><b>Objective:</b> Obtain Session effectiveness</p> <p><b>Frequency:</b> At the end of every wellness based session</p> <p><b>Trigger question:</b> When user responds negatively to bot-asked question <b>“Before you go can I ask how I’m doing so far?”</b></p> | <p>“ Too Repetitive”;</p> <p>“No”;</p> <p>“Understand me Better”</p> <p>Trigger options</p> <p>“I like it”; (positive)</p> <p>“Not today”;</p> <p>“So Far, So Good”;</p> <p>(positive)</p> <p>“Not Very Well”;</p> <p>(negative)</p> | 15              |
| Q5        | “Is the conversation helping you?”              | <p><b>Objective:</b> Obtain Loss-based session effectiveness</p> <p><b>Frequency:</b> At the end of every loss-based session</p>                                                                                                                                     | <p>“Yes Quite”;</p> <p>“A Little”;</p> <p>“Not Really”;</p>                                                                                                                                                                          | 11              |
| Q6        | “I’m still very new,                            | <p><b>Objective:</b> Obtain feedback on improvement areas</p>                                                                                                                                                                                                        | Only Free Text Entry                                                                                                                                                                                                                 | 1               |

| Reference | Feedback question                                                      | Details                                                                              | Pre formatted response options | Total responses |
|-----------|------------------------------------------------------------------------|--------------------------------------------------------------------------------------|--------------------------------|-----------------|
|           | and your feedback helps me grow. What do you think I could do better?" | <b>Frequency:</b> Every weekend                                                      |                                |                 |
| Q7        | "Anything else I could do better?"                                     | <b>Area:</b> Obtain feedback on improvement areas<br><b>Frequency:</b> Every weekend | Only Free Text Entry           | 1               |
|           |                                                                        |                                                                                      | <b>Total</b>                   | <b>282</b>      |
