# Supplementary material for: An Empathy-Driven, Conversational Artificial Intelligence Agent (Wysa) for Digital Mental Well-Being: Real-World Data Evaluation Mixed-Methods Study
Source: PubMed Central journal article supplement (PMC6286427; doi:10.2196/12106), 2018-11-23
Supplement: mhealth_v6i11e12106_app7.pdf [file mhealth_v6i11e12106_app7.pdf]

## Multimedia Appendix 7: Sample objection quotes from users

| Objection quotes                     |
|--------------------------------------|
| "Can we talk about something else?"  |
| "I don't understand"                 |
| "I just told you"                    |
| "I don't want to."                   |
| "I don't need this now"              |
| "No. Give a solution"                |
| "I'm not going to"                   |
| "This is not a good time to talk"    |
| "I don't wanna talk about it."       |
| "You have already asked that, bot~"  |
| "Sorry you're not helping me"        |
| "You don't help"                     |
| "you just sound ignorant that's all" |
| "Stop and listen to me let me speak" |
| "Doesn't work for now"               |
| "Stop this session"                  |
| "Stop the mindreading"               |
| "Stop repeating yourself"            |
| "This is not working"                |
| "Can you rephrase that?"             |
| "You do not understand me!!!"        |
| "They can't help me!"                |
